# Supplementary material
Source: Royal Society of Chemistry journal article supplement (doi:10.1039/d6fo01388k)
Supplement: d6fo01388k2.pdf [file d6fo01388k2.pdf]

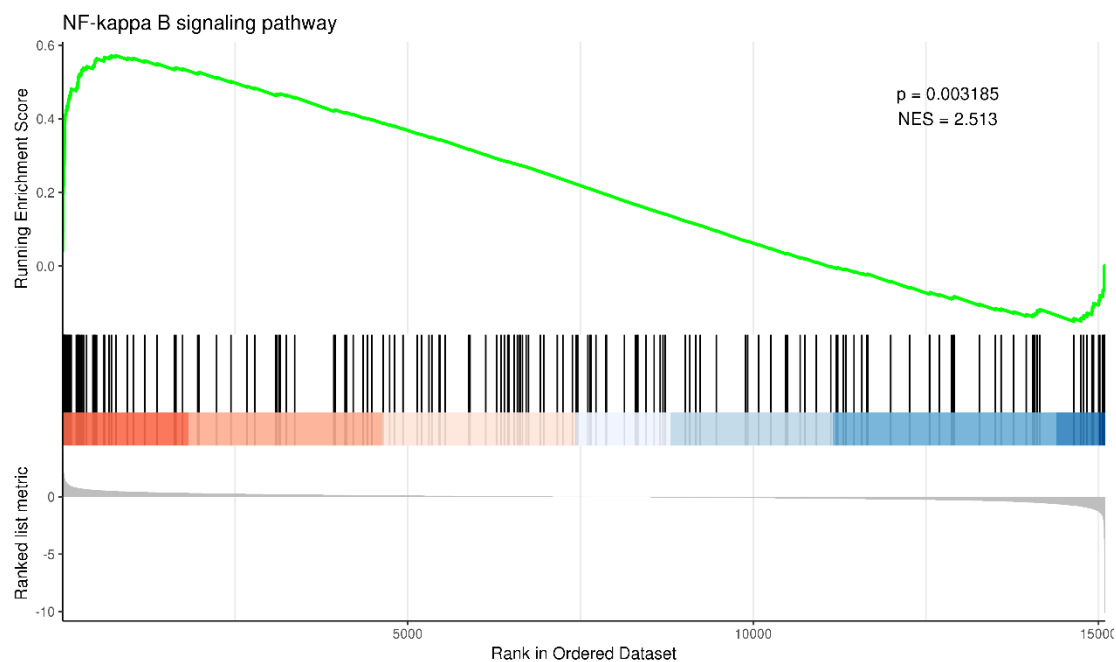

**Supplementary Figure S1. GSEA enrichment plot of the NF-kappa B signaling pathway.**

The analysis showed that this pathway was significantly enriched in Diosmin-H samples compared to the DSS group, with a normalized enrichment score (NES) of 2.513 and a nominal p-value of 0.003185.

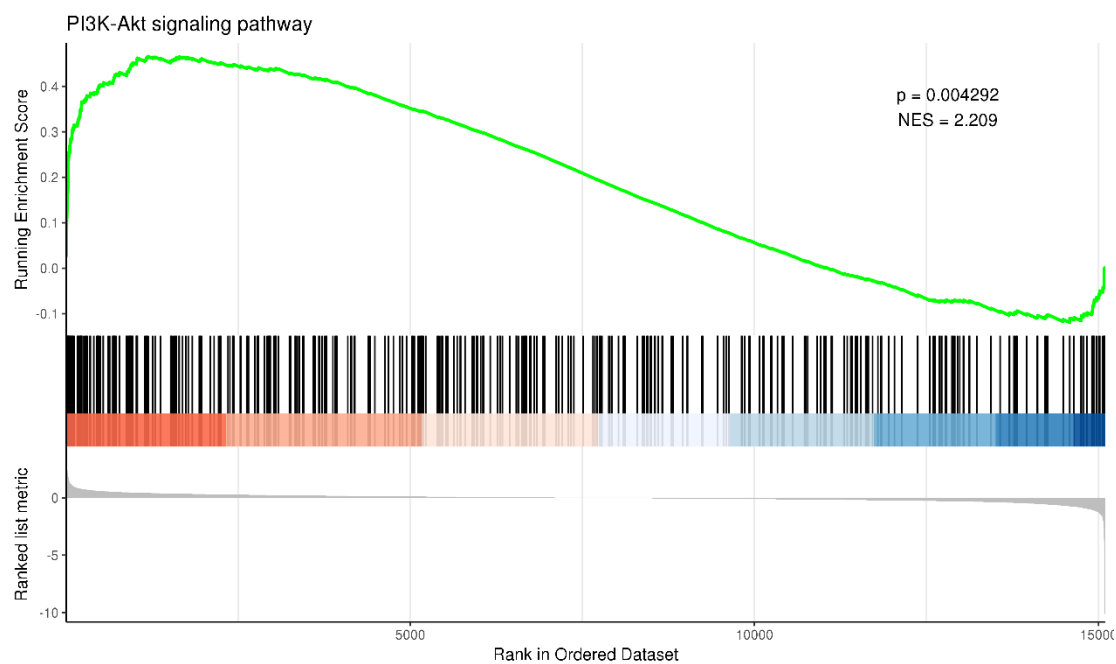

**Supplementary Figure S2. GSEA enrichment plot of the PI3K-Akt signaling pathway.**

The pathway was significantly enriched in Diosmin-H samples, with an NES of 2.209 and a nominal p-value of 0.004292, indicating that diosmin may exert anti-inflammatory effects by modulating PI3K-Akt signaling.
