# Supplementary material
Source: Royal Society of Chemistry journal article supplement (doi:10.1039/d6fo01388k)
Supplement: d6fo01388k3.pdf [file d6fo01388k3.pdf]

**Supplementary Table S1. Molecular docking parameters for key protein targets of diosmin.**

| Protein   | Coordinates                       | Box                |
|-----------|-----------------------------------|--------------------|
| PI3K      | X: -28.144, Y: -20.159, Z: 16.353 | 30 Å × 30 Å × 30 Å |
| Akt1      | X: -19.676, Y: 0.475, Z: 13.895   | 30 Å × 30 Å × 30 Å |
| NF-κB p65 | X: 59.161, Y: -42.741, Z: -50.225 | 30 Å × 30 Å × 30 Å |
| TNF-α     | X: -13.745, Y: -3.110, Z: 18.859  | 30 Å × 30 Å × 30 Å |

**Supplementary Table S2. Sources and dilution ratios of antibodies used in this study.**

| <b>Antibody</b>                            | <b>Supplier</b> | <b>Application/Type</b> | <b>Dilution ratio</b> |
|--------------------------------------------|-----------------|-------------------------|-----------------------|
| anti-ZO-1                                  | Proteintech     | Primary antibody        | 1: 500                |
| anti-Occludin                              | Proteintech     | Primary antibody        | 1: 5000               |
| anti-E-cadherin                            | Proteintech     | Primary antibody        | 1: 1000               |
| anti-GAPDH                                 | Proteintech     | Primary antibody        | 1: 5000               |
| anti-PI3K p85 $\alpha$                     | Abmart          | Primary antibody        | 1: 1000               |
| anti-AKT                                   | Abmart          | Primary antibody        | 1: 1000               |
| anti-p-AKT (Ser473)                        | Abmart          | Primary antibody        | 1: 1000               |
| anti-mTOR                                  | Abmart          | Primary antibody        | 1: 700                |
| anti-p-mTOR (Ser2448)                      | Abmart          | Primary antibody        | 1: 700                |
| anti-NF- $\kappa$ B p65                    | Abmart          | Primary antibody        | 1: 2000               |
| anti-p-NF- $\kappa$ B p65 (Ser536)         | Abmart          | Primary antibody        | 1: 2000               |
| anti-I $\kappa$ B $\alpha$                 | Abmart          | Primary antibody        | 1: 2000               |
| anti-p-I $\kappa$ B $\alpha$ (Ser32/Ser36) | Abmart          | Primary antibody        | 1: 2000               |
| anti- $\beta$ -Tubulin                     | Proteintech     | Primary antibody        | 1: 10000              |
| anti-BCL2                                  | Abmart          | Primary antibody        | 1: 1000               |
| anti-BAX                                   | Proteintech     | Primary antibody        | 1: 5000               |
| anti-TNF- $\alpha$                         | Wanleibio       | Primary antibody        | 1: 2000               |
| HRP goat anti-mouse IgG<br>(H+L)           | ABclonal        | Secondary antibody      | 1: 5000               |
| HRP goat anti-rabbit IgG<br>(H+L)          | ABclonal        | Secondary antibody      | 1: 5000               |

**Supplementary Table S3. Primer sequences, amplification efficiencies, and R<sup>2</sup> values for qRT-PCR analysis.**

| Gene          | Forward Primer (5'→3')    | Reverse Primer (5'→3')   | Efficiency (%) | R <sup>2</sup> |
|---------------|---------------------------|--------------------------|----------------|----------------|
| IL-1 $\beta$  | CAGGCAGGCAGTATCACTCATTG   | GGCTTTTTTGTTGTTTCATCTCGG | 102.8          | 0.981          |
| IL-6          | GGCTTTTTTGTTGTTTCATCTCGG  | GGACTCTGGCTTTGTCTTTCTTGT | 95.72          | 0.986          |
| IL-10         | GCTGGACAACATACTGCTAACCGAC | ATCATTCCGATAAGGCTTGGCA   | 109.52         | 0.977          |
| TNF- $\alpha$ | CAGGCGGTGCCTATGTCTC       | CGATCACCCGAAGTTCAGTAG    | 91.36          | 0.980          |
| GADPH         | AGGTCGGTGTGAACGGATTG      | TGTAGACCATGTAGTTGAGGTCA  | 99.46          | 0.992          |

**Supplementary Table S4. Top 20 core targets ranked by degree, betweenness centrality, and closeness centrality in the PPI network.**

| Rank | Degree   | betweenness centrality | closeness centrality |
|------|----------|------------------------|----------------------|
| 1    | TNF      | TP53                   | TP53                 |
| 2    | TP53     | TNF                    | TNF                  |
| 3    | AKT1     | AKT1                   | AKT1                 |
| 4    | NFKB1    | NFKB1                  | NFKB1                |
| 5    | HIF1A    | SRC                    | MMP9                 |
| 6    | MMP9     | EGFR                   | HIF1A                |
| 7    | CASP3    | TLR4                   | EGFR                 |
| 8    | EGFR     | MMP9                   | CASP3                |
| 9    | TLR4     | HIF1A                  | SRC                  |
| 10   | ESR1     | PTGS2                  | TLR4                 |
| 11   | SRC      | ESR1                   | PTGS2                |
| 12   | PTGS2    | CASP3                  | ESR1                 |
| 13   | PPARG    | PPARG                  | PPARG                |
| 14   | IGF1     | MMP2                   | MMP2                 |
| 15   | JAK2     | PARP1                  | IGF1                 |
| 16   | MMP2     | SERPINE1               | JAK2                 |
| 17   | IL2      | IGF1                   | IL2                  |
| 18   | KIT      | JAK2                   | KIT                  |
| 19   | SERPINE1 | TERT                   | SERPINE1             |
| 20   | BCL2L1   | ABCG2                  | BCL2L1               |
