# Supplementary material
Source: Royal Society of Chemistry journal article supplement (doi:10.1039/d6fo01388k)

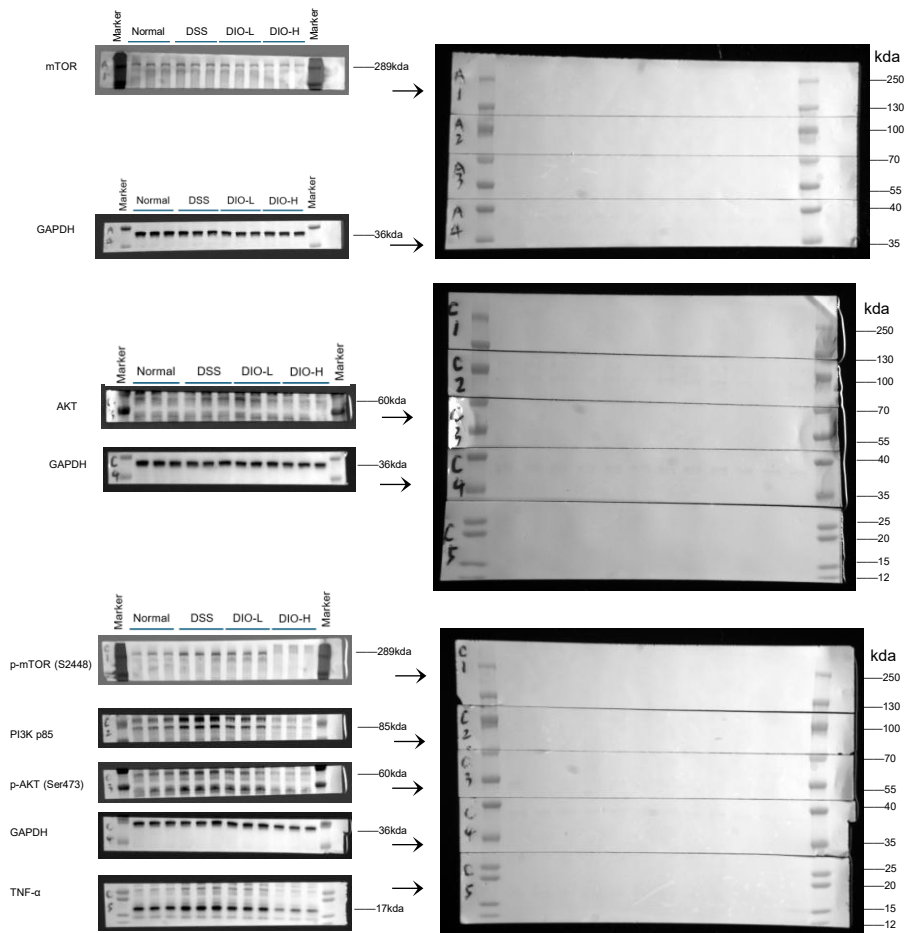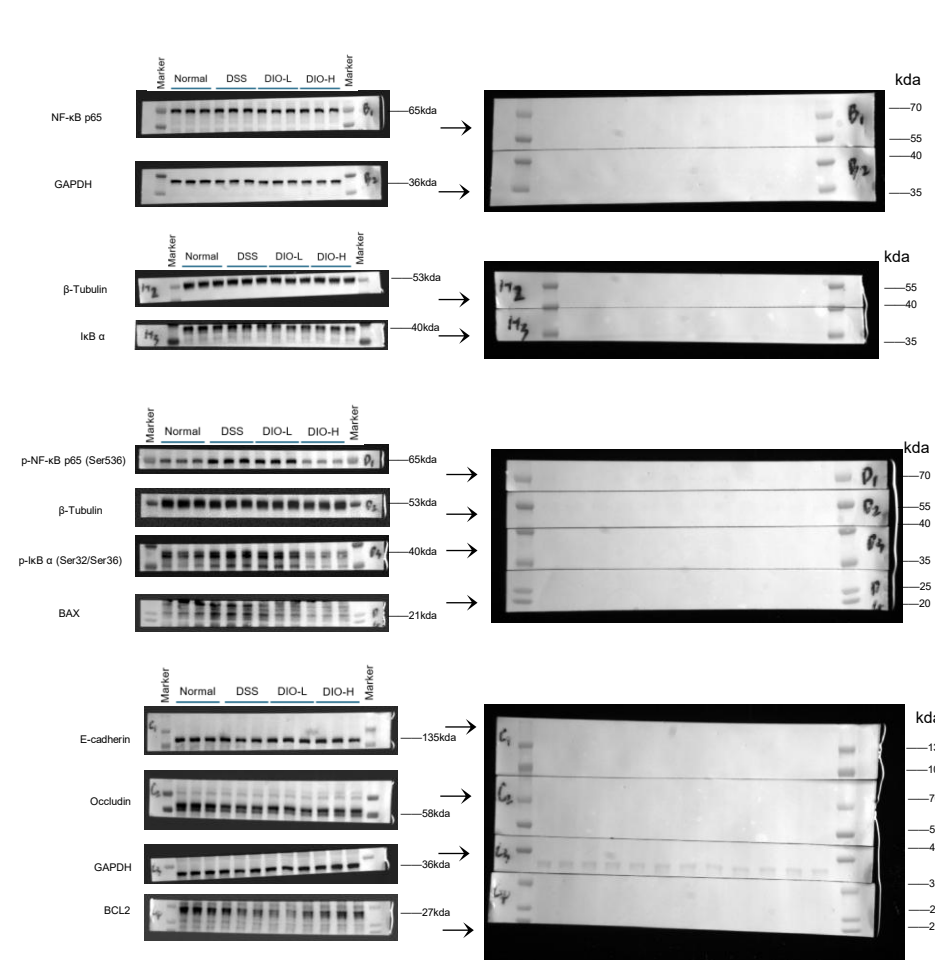

Original Western blot image of *in vitro* experiment

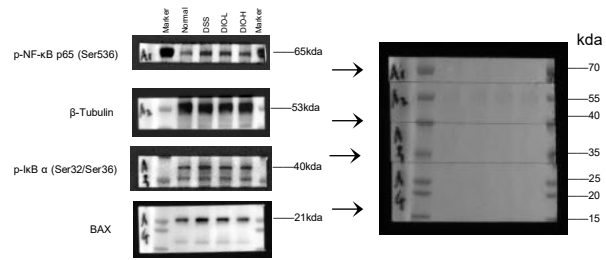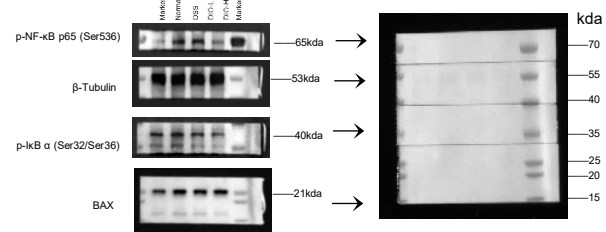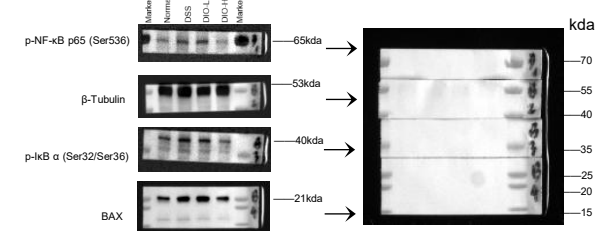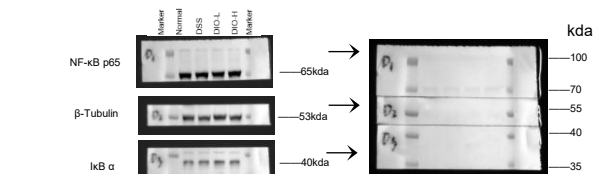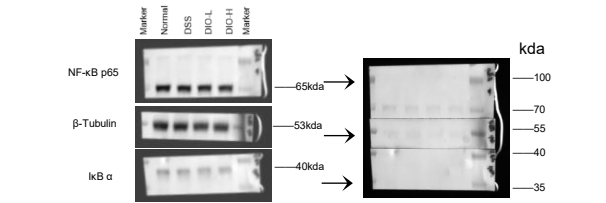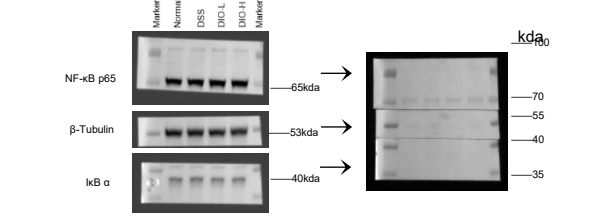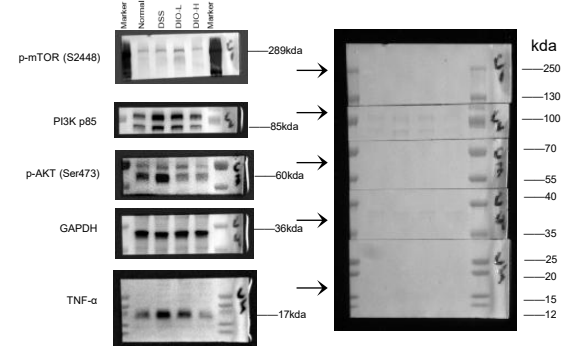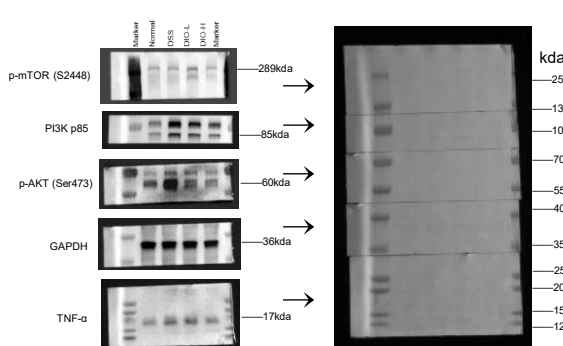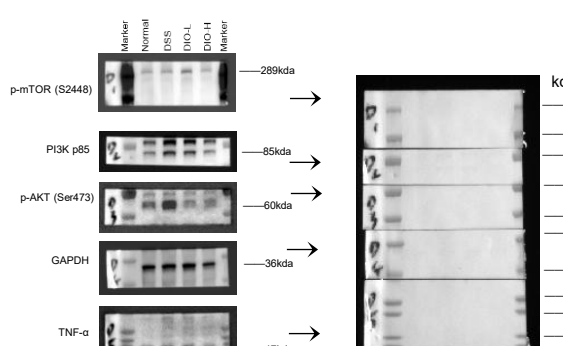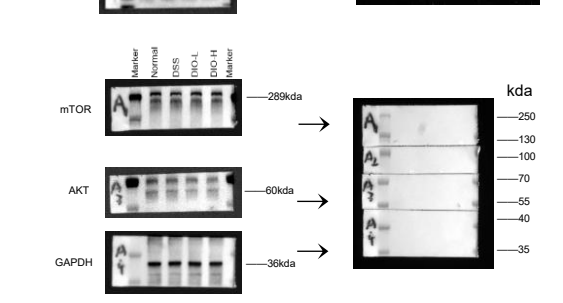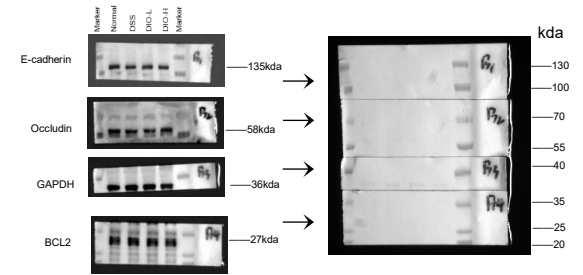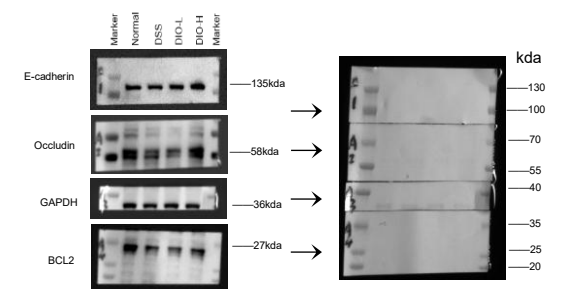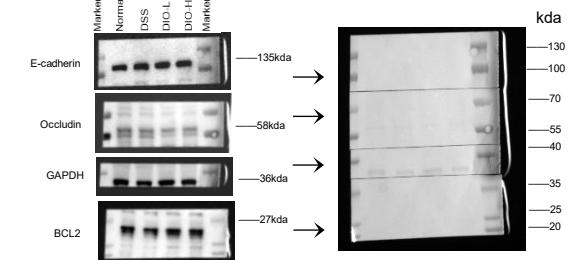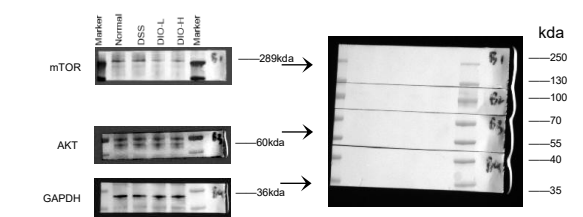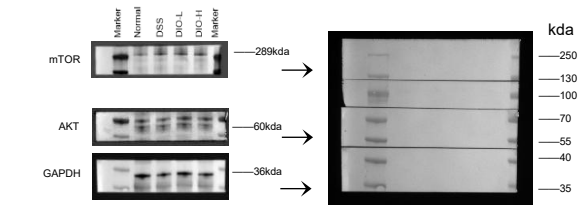

Supplement: d6fo01388k1.pdf [file d6fo01388k1.pdf]
